# Supplementary material for: A novel calix[4]arene-modified porphyrin-based dual-mode sensor for the specific detection of dopamine with excellent performance
Source: Royal Society of Chemistry journal article supplement (doi:10.1039/c9nj02524c), 2019-01-01
Supplement: c9nj02524c1.pdf [file c9nj02524c1.pdf]

Electronic Supplementary Information

**A novel calix[4]arene-modified porphyrin-based dual-modal sensor for the specific detection of dopamine with excellent performance**

Qi Liu,<sup>a</sup> Jurong Dong,<sup>a</sup> Qiqi Sun,<sup>a</sup> Shuai Zhao,<sup>a</sup> Yanli Chen\*,<sup>a</sup> and Jianzhuang Jiang\*,<sup>b</sup>

<sup>a</sup>School of Materials Science and Engineering, Institute of Advanced Materials, China University of Petroleum (East China), Qingdao 266580, China.

<sup>b</sup>Beijing Key Laboratory for Science and Application of Functional Molecular and Crystalline Materials, Department of Chemistry, University of Science and Technology Beijing, Beijing 100083, China.

\*E-mail: [yanlichen@upc.edu.cn](mailto:yanlichen@upc.edu.cn) (Y. Chen)

\*E-mail: [jianzhuang@ustb.edu.cn](mailto:jianzhuang@ustb.edu.cn) (J. Jiang.)

## Contents

**Fig. S1.** Experimental isotopic pattern for the molecular ion of compound  $H_2T[(C4AP)(Pyr)_3]P$  shown in the MALDI-TOF mass spectrum.

**Fig. S2.** Experimental isotopic pattern for the molecular ion of compound  $H_2T[(IP)(Pyr)_3]P$  shown in the MALDI-TOF mass spectrum.

**Fig. S3.**  $^1H$  NMR spectrum of **1** in  $CDCl_3$ .

**Fig. S4.**  $^{13}C$  NMR spectrum of **1** in  $CDCl_3$ .

**Fig. S5.** FT-IR spectrum of **1**(A) and **2**(B).

**Fig. S6.** TG/DSC curves of compound **1**.

**Fig. S7.** Fluorescence responses of  $1 \times 10^{-5}$  M THF solution of **2** with different concentrations of bio/medical molecules. (0 - 75  $\mu M$ ) ( $\lambda_{ex_{max}} = 400$  nm).

**Fig. S8.** The electronic absorption spectra of DA (black line), DA quinone (red line), NE (blue line), and NEQ (green line).

**Fig. S9.** CVs from 0.1 mM APAP (A) and from 0.1mM DA in the present of 0.1 mM APAP (B) in 0.1 M PBS (pH = 7.3) at the film **1**/ITO (a), **2**/ITO (b) and bare ITO (c) electrodes.

**Table S1.** Thermal properties of **1**.

**Table S2.** Electronic absorption data for **1** and **2** in THF and the QLS films.

## Experimental Section

**Chemicals:** Bis(triphenylphosphine) palladium(II) chloride ( $\text{PdCl}_2(\text{PPh}_3)_2$ ) was purchased from TCI. Triethylamine and dichloromethane for section 3 were freshly distilled from  $\text{CaH}_2$  under an atmosphere of nitrogen. Column chromatography was carried out on silica gel (200~300 mesh) with the indicated eluents. All other reagents and solvents were used as received. The compounds of calix[4]arene was prepared according to the literature methods.

**Measurements:** Electronic absorption spectra were recorded with a Hitachi U-3900 spectrophotometer.  $^1\text{H}$  NMR spectrum was recorded on a Bruker DPX 400 spectrometer in  $\text{CDCl}_3$ . Spectrum was referenced internally using the residual solvent resonance ( $\delta = 7.26$  for  $^1\text{H}$  NMR) relative to  $\text{SiMe}_4$ .  $^{13}\text{C}$  NMR spectrum was recorded on a Bruker DPX 400 spectrometer in  $\text{CDCl}_3$ . AFM images were collected in air under ambient conditions using the tapping mode with a NanoscopeIII/Bioscope scanning probe microscope from Digital instruments. MALDI-TOF mass spectrum was taken on a Bruker BIFLEX III ultra-high-resolution Fourier transform ion cyclotron resonance (FT-ICR) mass spectrometer with alpha-cyano-4-hydroxycinnamic acid as matrix. IR spectra were recorded as KBr pellets using a Bruker Tensor 37 spectrometer with 2  $\text{cm}^{-1}$  resolution. Thermogravimetry/differential scanning calorimetry (TG-DSC)

measurements were carried out with TA-SDT650. Fluorescent measurement was carried out with F-7000 spectrophotometer.

**Synthesis of H<sub>2</sub>T[(IP)(Pyr)<sub>3</sub>]P (2):** In scheme 1, Iodobenzaldehyde (1.16 g; 5 mmol) and pyrene-1-carboxaldehyde (4.6 g; 20 mmol) were stirred and refluxed in propionic acid (200 ml) for 0.5 h, and then pyrrole (1.34 g; 20 mmol) was added. The mixture was stirred at 140°C for 0.5 h, then MeOH was added and stay overnight below 0°C. The crude product was purified by column chromatography to afford H<sub>2</sub>T[(IP)(Pyr)<sub>3</sub>]P in 10% yield(CHCl<sub>3</sub>: petroleum ether = 7:3). MALDI-TOF MS: an isotopic cluster peaking at m/z 1112, calcd for H<sub>2</sub>T[(IP)(Pyr)<sub>3</sub>]P, [M]<sup>+</sup>,1113.07.

**Synthesis of propinyl-calix[4]arene:** In scheme 2, Calix[4]arene (3.10 g; 4.78 mmol) and potash (0.57 g; 4.12 mmol) were stirred and refluxed in acetonitrile (50ml) for 1 h, and then propargyl bromide (80 wt% solution in toluene, 0.82 g; 6.89 mmol) was added. The mixture was stirred at 57°C for 18 h, and the crude product was purified by column chromatography (CHCl<sub>3</sub>:n-hexane = 3:1) to afford propinyl-calix[4]arene in 20% yield.<sup>1</sup>MALDI-TOF MS: an isotopic cluster peaking at m/z 686, calcd for propinyl-calix[4]arene, [M]<sup>+</sup>, 686.98.

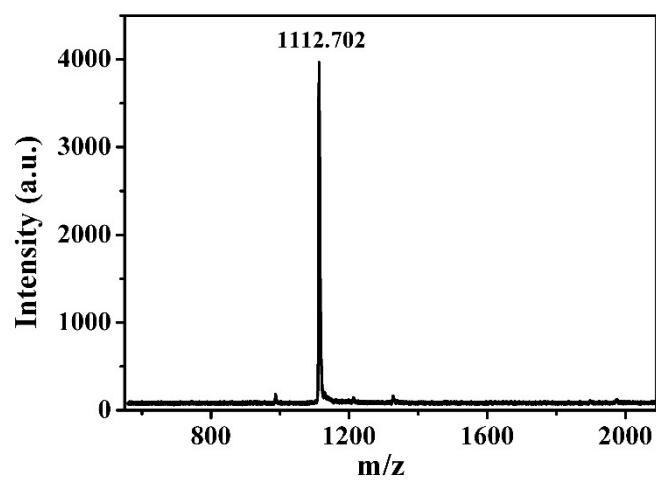

**Fig. S1.** Experimental isotopic pattern for the molecular ion of compound  $\text{H}_2\text{T}[(\text{IP})(\text{Pyr})_3]\text{P}$  shown in the MALDI-TOF mass spectrum.

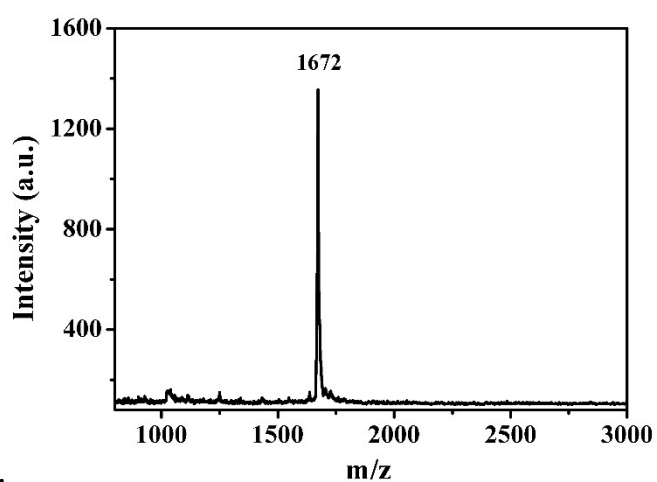

**Fig. S2.** Experimental isotopic pattern for the molecular ion of compound  $\text{H}_2\text{T}[(\text{C4AP})(\text{Pyr})_3]\text{P}$  shown in the MALDI-TOF mass spectrum.

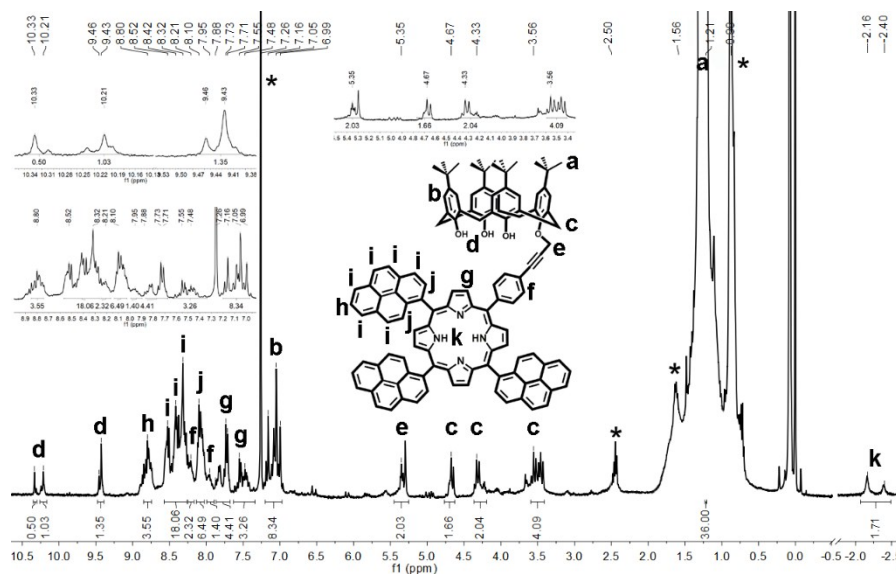

**Fig. S3.** <sup>1</sup>H NMR spectrum of **1** in CDCl<sub>3</sub>. The signals due to residue solvents ( CHCl<sub>3</sub>, H<sub>2</sub>O, trimethylamine and petroleum ether) are denoted as \*. (The insets are the signals in the range of 3.4–5.4, 7.0–8.9 and 9.3–10.3 ppm).

<sup>1</sup>H NMR (400 MHz, Toluene-D<sub>8</sub>, 343K) for **1**, δ: -2.40, -2.16 (s, 2, Hk), 1.21 (s, 36, Ha), 3.56, 4.33, 4.67 (s, 8, Hc), 5.35 (s, 2, He), 6.99, 7.05, 7.16(s, 8, Hb), 7.48, 7.55, 7.71, 7.73 (m, 8, Hg), 7.95, 8.21 (d, 4, Hf), 8.10 (m, 6, Hj), 8.32, 8.38, 8.42 (m, 18, Hi), 8.52 (m, 3, Hh), 9.43, 10.21, 10.33 (m, 3, Hd).

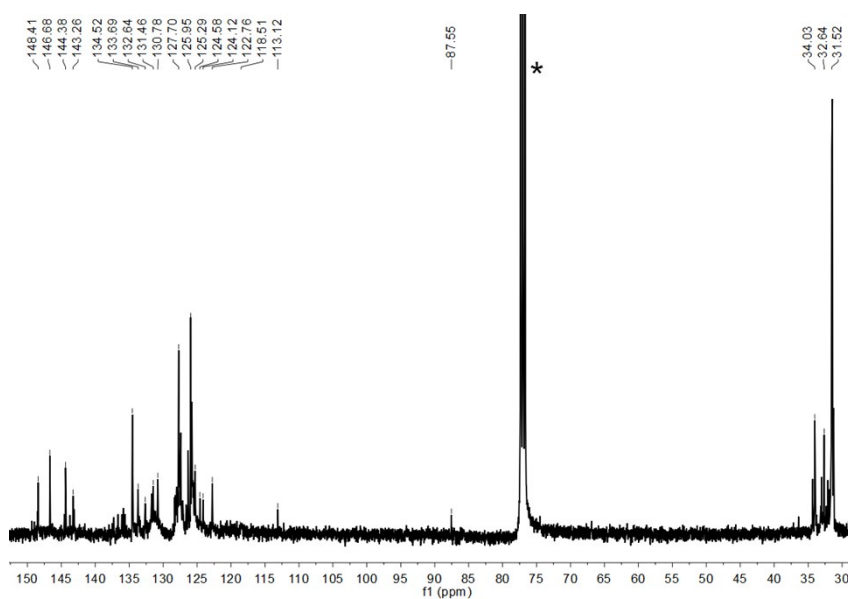

**Fig. S4.**  $^{13}\text{C}$  NMR spectrum of **1** in  $\text{CDCl}_3$ . The signals due to residue solvents of  $\text{CHCl}_3$ , is denoted as  $*$ .  $^{13}\text{H}$  NMR ( $\text{CHCl}_3$ , 400 MHz,  $\delta/\text{ppm}$ ): 148.41, 146.68, 144.38, 143.26, 134.52, 133.69, 132.64, 131.46, 130.78, 127.70, 125.95, 125.29, 124.58, 124.12, 122.76, 118.51, 113.12, 87.55, 34.03, 32.64, 31.52.

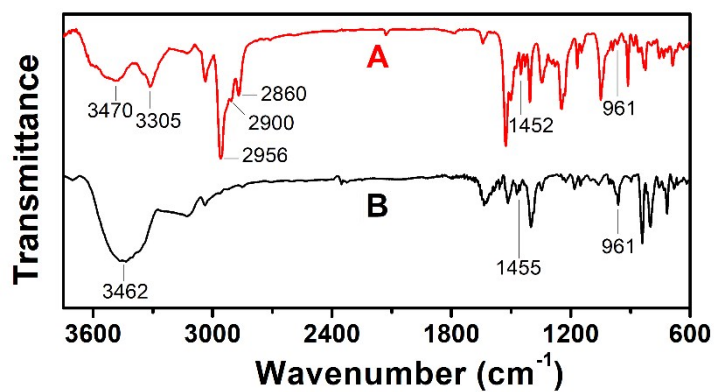

**Fig. S5.** FT-IR spectrum of **1**(A) and **2**(B).

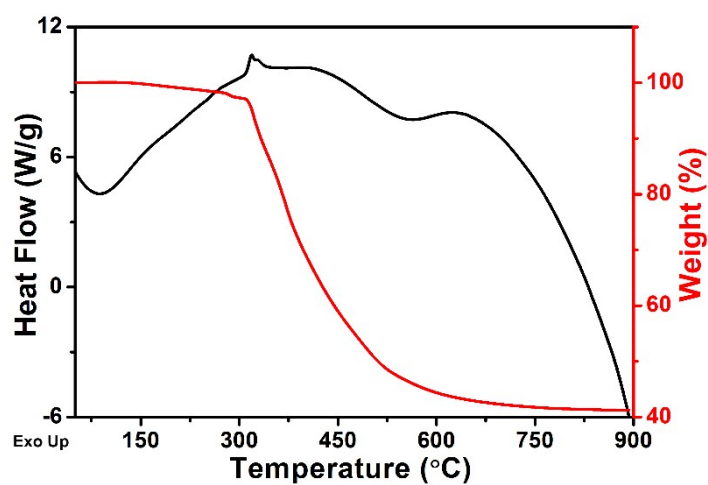

**Fig. S6.** TG/DSC curves of compound **1**.

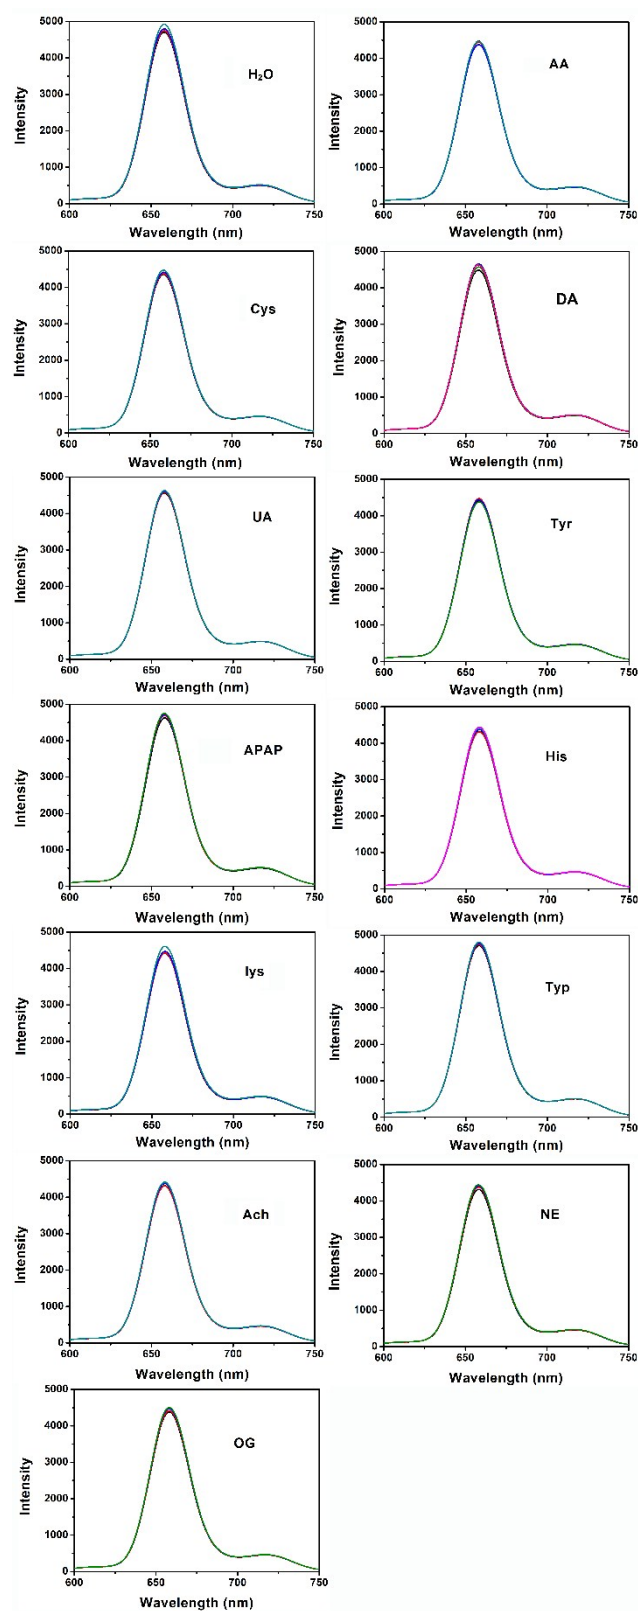

**Fig. S7.** Fluorescence responses of  $1 \times 10^{-5}$  M THF solution of **2** with different concentrations of bio/medical molecules. (0 - 50  $\mu$ M) ( $\lambda_{ex_{max}} = 400$  nm).



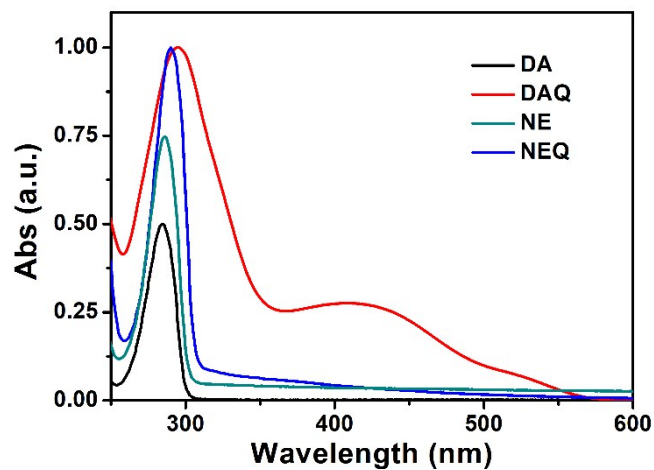

**Fig. S8.** The electronic absorption spectra of DA (black line), DA quinone (red line), NE (green line), and NEQ (blue line).

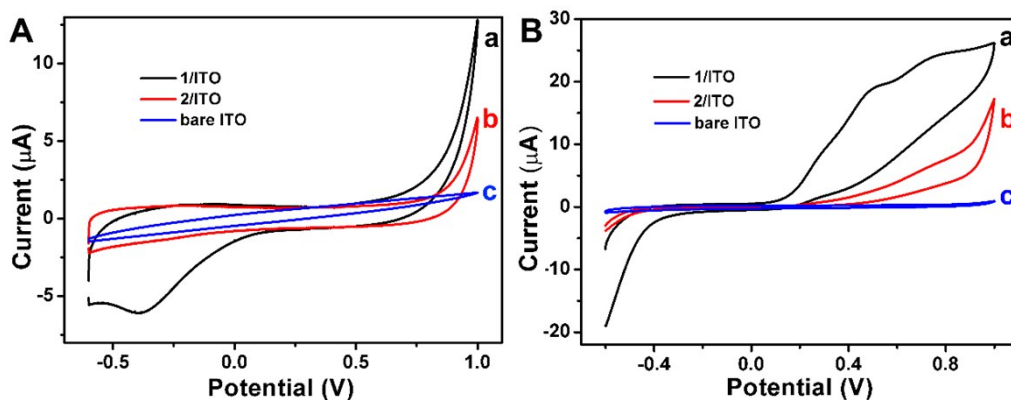

**Fig. S9.** CVs from 0.1 mM APAP (A) and from 0.1mM DA in the present of 0.1 mM APAP (B) in 0.1 M PBS (pH 7.3) at the film 1/ITO (a), 2/ITO (b) and bare ITO (c) electrodes.

**Table S1.** Thermal properties of **1**.

| $T_m$ (°C) | $T_{onset}$ (°C)<br>(1 step) | $T_{onset}$ (°C)<br>(2 step) | $T_{max}$ (°C)<br>(2step) | Residueb /% |
|------------|------------------------------|------------------------------|---------------------------|-------------|
| 557.6      | 272.8                        | 313.4                        | 328.5                     | 41          |

**Table S2.** Electronic absorption data for **1** and **2** in THF and the QLS films.

| Compounds | Solution (nm)           | Film (nm)               |
|-----------|-------------------------|-------------------------|
| <b>1</b>  | 427, 518, 553, 591, 649 | 436, 524, 559, 595, 649 |
| <b>2</b>  | 430, 519, 555, 592, 651 | 442, 525, 560, 596, 654 |

## Reference

- [1] M. J. Chetcuti, A. M. J. Devoille, A. Othman, R. Souane, P. Thuéry and J. Vicens *Dalton Trans.*, 2009, 2999-3008.
